# Supplementary material
Source: publisher figshare collection journal article supplement (https://brill.figshare.com/articles/dataset/_/16594898)

## Online appendix

The self-defeating game: how state capacity and policy choice affect political survival

Dustin Gilbreath and Koba Turmanidze

**Table A1. Countries and elections**

| #  | Country                  | Number of elections |
|----|--------------------------|---------------------|
| 1  | Afghanistan              | 1                   |
| 2  | Albania                  | 4                   |
| 3  | Algeria                  | 8                   |
| 4  | Angola                   | 3                   |
| 5  | Argentina                | 14                  |
| 6  | Armenia                  | 6                   |
| 7  | Australia                | 12                  |
| 8  | Austria                  | 14                  |
| 9  | Azerbaijan               | 10                  |
| 10 | Bahrain                  | 2                   |
| 11 | Bangladesh               | 7                   |
| 12 | Belarus                  | 9                   |
| 13 | Belgium                  | 5                   |
| 14 | Benin                    | 3                   |
| 15 | Bolivia                  | 8                   |
| 16 | Botswana                 | 6                   |
| 17 | Brazil                   | 7                   |
| 18 | Bulgaria                 | 6                   |
| 19 | Burkina Faso             | 8                   |
| 20 | Burundi                  | 1                   |
| 21 | Cabo Verde               | 1                   |
| 22 | Cambodia                 | 2                   |
| 23 | Cameroon                 | 5                   |
| 24 | Canada                   | 11                  |
| 25 | Central African Republic | 6                   |
| 26 | Chad                     | 5                   |
| 27 | Chile                    | 9                   |
| 28 | Colombia                 | 7                   |
| 29 | Comoros                  | 4                   |
| 30 | Congo, Dem. Rep.         | 7                   |
| 31 | Congo, Rep.              | 1                   |
| 32 | Costa Rica               | 8                   |
| 33 | Cote d'Ivoire            | 4                   |
| 34 | Croatia                  | 10                  |
| 35 | Cyprus                   | 10                  |
| 36 | Czech Republic           | 9                   |
| 37 | Denmark                  | 12                  |
| 38 | Djibouti                 | 5                   |

|    |                    |    |
|----|--------------------|----|
| 39 | Dominican Republic | 13 |
| 40 | Ecuador            | 8  |
| 41 | Egypt, Arab Rep.   | 9  |
| 42 | El Salvador        | 22 |
| 43 | Equatorial Guinea  | 7  |
| 44 | Estonia            | 4  |
| 45 | Ethiopia           | 5  |
| 46 | Fiji               | 8  |
| 47 | Finland            | 15 |
| 48 | France             | 6  |
| 49 | Gabon              | 8  |
| 50 | Gambia, The        | 11 |
| 51 | Georgia            | 6  |
| 52 | Germany            | 9  |
| 53 | Ghana              | 6  |
| 54 | Greece             | 11 |
| 55 | Guatemala          | 4  |
| 56 | Guinea             | 5  |
| 57 | Guinea-Bissau      | 5  |
| 58 | Guyana             | 7  |
| 59 | Haiti              | 4  |
| 60 | Honduras           | 7  |
| 61 | Hungary            | 5  |
| 62 | India              | 8  |
| 63 | Indonesia          | 8  |
| 64 | Iran, Islamic Rep. | 10 |
| 65 | Iraq               | 3  |
| 66 | Ireland            | 10 |
| 67 | Israel             | 3  |
| 68 | Italy              | 9  |
| 69 | Jamaica            | 9  |
| 70 | Japan              | 21 |
| 71 | Jordan             | 5  |
| 72 | Kazakhstan         | 7  |
| 73 | Kenya              | 4  |
| 74 | Korea, Rep.        | 14 |
| 75 | Kuwait             | 1  |
| 76 | Kyrgyz Republic    | 4  |
| 77 | Latvia             | 6  |
| 78 | Lebanon            | 4  |
| 79 | Lesotho            | 5  |

## Online appendix

The self-defeating game: how state capacity and policy choice affect political survival

Dustin Gilbreath and Koba Turmanidze

|     |                    |    |
|-----|--------------------|----|
| 80  | Liberia            | 2  |
| 81  | Lithuania          | 8  |
| 82  | Macedonia, FYR     | 7  |
| 83  | Madagascar         | 8  |
| 84  | Malawi             | 4  |
| 85  | Malaysia           | 7  |
| 86  | Mali               | 4  |
| 87  | Mauritania         | 6  |
| 88  | Mauritius          | 7  |
| 89  | Mexico             | 12 |
| 90  | Moldova            | 6  |
| 91  | Mongolia           | 10 |
| 92  | Morocco            | 5  |
| 93  | Mozambique         | 4  |
| 94  | Myanmar            | 1  |
| 95  | Namibia            | 4  |
| 96  | Nepal              | 3  |
| 97  | Netherlands        | 12 |
| 98  | New Zealand        | 10 |
| 99  | Nicaragua          | 5  |
| 100 | Niger              | 5  |
| 101 | Nigeria            | 4  |
| 102 | Norway             | 9  |
| 103 | Pakistan           | 3  |
| 104 | Panama             | 7  |
| 105 | Papua New Guinea   | 7  |
| 106 | Paraguay           | 8  |
| 107 | Peru               | 8  |
| 108 | Philippines        | 9  |
| 109 | Poland             | 9  |
| 110 | Portugal           | 6  |
| 111 | Romania            | 6  |
| 112 | Russian Federation | 8  |
| 113 | Rwanda             | 1  |
| 114 | Senegal            | 9  |
| 115 | Sierra Leone       | 3  |
| 116 | Singapore          | 8  |
| 117 | Slovak Republic    | 8  |
| 118 | Solomon Islands    | 1  |
| 119 | South Africa       | 9  |
| 120 | Spain              | 11 |

|     |                      |    |
|-----|----------------------|----|
| 121 | Sri Lanka            | 10 |
| 122 | Sudan                | 2  |
| 123 | Suriname             | 1  |
| 124 | Sweden               | 10 |
| 125 | Switzerland          | 7  |
| 126 | Syrian Arab Republic | 2  |
| 127 | Tajikistan           | 4  |
| 128 | Tanzania             | 4  |
| 129 | Thailand             | 11 |
| 130 | Togo                 | 8  |
| 131 | Trinidad and Tobago  | 9  |
| 132 | Tunisia              | 6  |
| 133 | Turkey               | 7  |
| 134 | Uganda               | 2  |
| 135 | Ukraine              | 9  |
| 136 | United Kingdom       | 8  |
| 137 | United States        | 18 |
| 138 | Uruguay              | 5  |
| 139 | Venezuela, RB        | 10 |
| 140 | Yemen, Rep.          | 4  |
| 141 | Zambia               | 5  |
| 142 | Zimbabwe             | 9  |

## Online appendix

The self-defeating game: how state capacity and policy choice affect political survival

Dustin Gilbreath and Koba Turmanidze

**Table A2. Logit Estimates of the effect of state capacity on losing elections (Base models)**

|                                             | (1)                | (2)                | (3)                | (4)                |
|---------------------------------------------|--------------------|--------------------|--------------------|--------------------|
| State capacity (lagged)                     | -0.36<br>(0.31)    | -0.23<br>(0.30)    | -0.38<br>(0.31)    | -0.26<br>(0.30)    |
| State capacity volatility                   | 2.70**<br>(1.05)   | 1.68*<br>(0.96)    | 4.36*<br>(2.23)    | 2.25*<br>(1.26)    |
| State capacity growth                       | -2.07*<br>(1.15)   | -2.37**<br>(1.11)  | -4.70**<br>(2.36)  | -2.29*<br>(1.36)   |
| Natural Resources (lagged)                  | -2.22*<br>(1.17)   | -3.16***<br>(1.15) | -2.23*<br>(1.19)   | -3.19***<br>(1.16) |
| GDP growth (lagged)                         | -3.30**<br>(1.67)  | -3.26*<br>(1.72)   | -3.42**<br>(1.70)  | -3.31*<br>(1.70)   |
| Economic crisis                             | 0.38**<br>(0.18)   | 0.30<br>(0.19)     | 0.36**<br>(0.18)   | 0.31<br>(0.19)     |
| Partly free                                 | -0.50**<br>(0.20)  |                    | -0.40<br>(0.25)    |                    |
| Not free                                    | -1.95***<br>(0.44) |                    | -1.88***<br>(0.57) |                    |
| Year                                        | 0.01*<br>(0.01)    | 0.01<br>(0.01)     | 0.01<br>(0.01)     | 0.01<br>(0.01)     |
| Potential fraud                             |                    | -0.78***<br>(0.22) |                    | -0.61**<br>(0.28)  |
| State capacity volatility * Partly free     |                    |                    | -2.01<br>(2.35)    |                    |
| State capacity volatility * Not free        |                    |                    | -1.33<br>(3.02)    |                    |
| State capacity growth * Partly free         |                    |                    | 2.89<br>(2.67)     |                    |
| State capacity growth * Not free            |                    |                    | 4.12<br>(3.63)     |                    |
| State capacity volatility * Potential fraud |                    |                    |                    | -2.06<br>(2.25)    |
| State capacity growth * Potential fraud     |                    |                    |                    | -0.82<br>(2.60)    |
| Constant                                    | -27.36*<br>(16.62) | -20.33<br>(16.67)  | -26.72<br>(16.91)  | -21.01<br>(16.71)  |
| <i>N</i>                                    | 973                | 969                | 973                | 969                |
| Log likelihood                              | -562.32            | -569.23            | -561.38            | -568.71            |

Standard errors in parentheses

\*  $p < 0.10$ , \*\*  $p < 0.05$ , \*\*\*  $p < 0.01$

**Online appendix**

The self-defeating game: how state capacity and policy choice affect political survival

Dustin Gilbreath and Koba Turmanidze

**Table A3. Logit Estimates of the effect of state capacity on losing elections  
(Base models with random effects)**

|                                             | (1)                | (2)                | (3)                | (4)                |
|---------------------------------------------|--------------------|--------------------|--------------------|--------------------|
| State capacity (lagged)                     | -0.32<br>(0.31)    | -0.16<br>(0.31)    | -0.33<br>(0.31)    | -0.19<br>(0.31)    |
| State capacity volatility                   | 3.18***<br>(1.14)  | 2.27**<br>(1.13)   | 4.38*<br>(2.27)    | 2.81**<br>(1.36)   |
| State capacity growth                       | -2.09*<br>(1.16)   | -2.31*<br>(1.19)   | -4.18<br>(2.77)    | -1.89<br>(1.57)    |
| Natural Resources (lagged)                  | -2.45**<br>(1.09)  | -3.62***<br>(1.08) | -2.44**<br>(1.09)  | -3.64***<br>(1.08) |
| GDP growth (lagged)                         | -4.00**<br>(1.80)  | -3.99**<br>(1.78)  | -4.00**<br>(1.82)  | -4.04**<br>(1.79)  |
| Economic crisis                             | 0.41**<br>(0.20)   | 0.33*<br>(0.19)    | 0.40**<br>(0.20)   | 0.34*<br>(0.19)    |
| Partly free                                 | -0.56***<br>(0.20) |                    | -0.48*<br>(0.26)   |                    |
| Not free                                    | -2.11***<br>(0.38) |                    | -2.07***<br>(0.53) |                    |
| Year                                        | 0.02*<br>(0.01)    | 0.01<br>(0.01)     | 0.02*<br>(0.01)    | 0.01*<br>(0.01)    |
| Potential fraud                             |                    | -0.78***<br>(0.20) |                    | -0.60**<br>(0.28)  |
| State capacity volatility * Partly free     |                    |                    | -1.48<br>(2.54)    |                    |
| State capacity volatility * Not free        |                    |                    | -0.88<br>(3.65)    |                    |
| State capacity growth * Partly free         |                    |                    | 2.36<br>(3.10)     |                    |
| State capacity growth * Not free            |                    |                    | 2.95<br>(3.81)     |                    |
| State capacity volatility * Potential fraud |                    |                    |                    | -2.08<br>(2.28)    |
| State capacity growth * Potential fraud     |                    |                    |                    | -1.50<br>(2.51)    |
| Constant                                    | -31.01*<br>(16.10) | -26.59<br>(16.31)  | -30.75*<br>(16.14) | -27.31*<br>(16.34) |
| Insig2u                                     | -0.69*<br>(0.37)   | -0.59*<br>(0.35)   | -0.71*<br>(0.38)   | -0.58<br>(0.36)    |
| Sigma_u                                     | 0.71<br>(0.13)     | 0.75<br>(0.13)     | 0.70<br>(0.13)     | 0.75<br>(0.13)     |
| Rho                                         | 0.13<br>(0.04)     | 0.14<br>(0.04)     | 0.13<br>(0.04)     | 0.15<br>(0.04)     |
| <i>N</i>                                    | 973                | 969                | 973                | 969                |
| Log likelihood                              | -553.43            | -558.85            | -553.00            | -558.30            |

Standard errors in parentheses

\*  $p < 0.10$ , \*\*  $p < 0.05$ , \*\*\*  $p < 0.01$

## Online appendix

The self-defeating game: how state capacity and policy choice affect political survival

Dustin Gilbreath and Koba Turmanidze

**Table A4. Logit Estimates of the effect of state capacity on losing elections (Additional models)**

|                                                   | (5)                | (6)               | (7)                | (8)                |
|---------------------------------------------------|--------------------|-------------------|--------------------|--------------------|
| State capacity (lagged)                           | -0.23<br>(0.30)    | -0.29<br>(0.34)   | -0.23<br>(0.30)    | -0.33<br>(0.34)    |
| State capacity volatility                         | 1.90**<br>(0.94)   | 2.90***<br>(1.04) | 1.11<br>(1.22)     | 1.90*<br>(1.06)    |
| State capacity growth                             | -1.92*<br>(1.06)   | -2.31**<br>(1.05) | -0.50<br>(1.30)    | -3.67***<br>(1.17) |
| Natural Resources (lagged)                        | -3.45***<br>(1.21) | -2.50**<br>(1.12) | -3.59***<br>(1.22) | -2.64**<br>(1.15)  |
| GDP growth (lagged)                               | -3.40**<br>(1.71)  | -2.86<br>(1.83)   | -3.63**<br>(1.69)  | -2.92<br>(1.82)    |
| Economic crisis                                   | 0.32<br>(0.20)     | 0.37*<br>(0.19)   | 0.34*<br>(0.20)    | 0.35*<br>(0.19)    |
| Opposition vote share                             | 1.16***<br>(0.41)  |                   | 0.00<br>(.)        |                    |
| Year                                              | 0.01<br>(0.01)     | 0.00<br>(0.01)    | 0.01<br>(0.01)     | 0.01<br>(0.01)     |
| Polity IV score                                   |                    | 0.12***<br>(0.02) |                    | 0.00<br>(.)        |
| State capacity volatility * Opposition vote share |                    |                   | 4.84<br>(4.39)     |                    |
| State capacity growth * Opposition vote share     |                    |                   | -8.96*<br>(5.09)   |                    |
| State capacity volatility * Polity IV score       |                    |                   |                    | 0.25<br>(0.16)     |
| State capacity growth * Polity IV score           |                    |                   |                    | 0.27<br>(0.18)     |
| Constant                                          | -19.59<br>(17.16)  | -10.10<br>(17.74) | -18.65<br>(17.05)  | -11.79<br>(17.87)  |
| <i>N</i>                                          | 981                | 967               | 981                | 967                |
| Log likelihood                                    | -582.05            | -549.84           | -580.03            | -548.30            |

Standard errors in parentheses

\*  $p < 0.10$ , \*\*  $p < 0.05$ , \*\*\*  $p < 0.01$

**Online appendix**

The self-defeating game: how state capacity and policy choice affect political survival

Dustin Gilbreath and Koba Turmanidze

**Table A5. Logit Estimates of the effect of state capacity on losing elections  
(Additional random effects models)**

|                                                   | (5)                | (6)                | (7)                | (8)                |
|---------------------------------------------------|--------------------|--------------------|--------------------|--------------------|
| State capacity (lagged)                           | -0.10<br>(0.31)    | -0.18<br>(0.31)    | -0.09<br>(0.31)    | -0.21<br>(0.32)    |
| State capacity volatility                         | 2.50**<br>(1.08)   | 3.12***<br>(1.09)  | 1.84<br>(1.41)     | 2.04<br>(1.26)     |
| State capacity growth                             | -1.99*<br>(1.12)   | -2.55**<br>(1.16)  | -0.48<br>(1.41)    | -4.00***<br>(1.54) |
| Natural Resources (lagged)                        | -3.94***<br>(1.11) | -2.97***<br>(1.12) | -4.06***<br>(1.12) | -3.08***<br>(1.12) |
| GDP growth (lagged)                               | -4.25**<br>(1.79)  | -3.85**<br>(1.85)  | -4.42**<br>(1.79)  | -3.77**<br>(1.85)  |
| Economic crisis                                   | 0.35*<br>(0.19)    | 0.41**<br>(0.20)   | 0.37*<br>(0.19)    | 0.40**<br>(0.20)   |
| Opposition vote share                             | 1.14***<br>(0.39)  |                    | 0.00<br>(.)        |                    |
| Year                                              | 0.01<br>(0.01)     | 0.00<br>(0.01)     | 0.01<br>(0.01)     | 0.01<br>(0.01)     |
| Polity IV score                                   |                    | 0.13***<br>(0.02)  |                    | 0.00<br>(.)        |
| State capacity volatility * Opposition vote share |                    |                    | 3.97<br>(5.09)     |                    |
| State capacity growth * Opposition vote share     |                    |                    | -9.34*<br>(5.51)   |                    |
| State capacity volatility * Polity IV score       |                    |                    |                    | 0.22<br>(0.17)     |
| State capacity growth * Polity IV score           |                    |                    |                    | 0.33<br>(0.25)     |
| Constant                                          | -25.88<br>(16.36)  | -9.56<br>(16.53)   | -25.33<br>(16.36)  | -11.35<br>(16.60)  |
| Insig2u                                           | -0.46<br>(0.34)    | -0.76**<br>(0.38)  | -0.47<br>(0.34)    | -0.77**<br>(0.39)  |
| Sigma_u                                           | 0.80<br>(0.13)     | 0.68<br>(0.13)     | 0.79<br>(0.13)     | 0.68<br>(0.13)     |
| Rho                                               | 0.16<br>(0.05)     | 0.12<br>(0.04)     | 0.16<br>(0.05)     | 0.13<br>(0.04)     |
| <i>N</i>                                          | 981                | 967                | 981                | 967                |
| Log likelihood                                    | -569.69            | -541.68            | -568.05            | -540.40            |

**Online appendix**

The self-defeating game: how state capacity and policy choice affect political survival  
Dustin Gilbreath and Koba Turmanidze

**Graph A1. State capacity as a function of natural resources**  
Marginal effects at 95% CIs

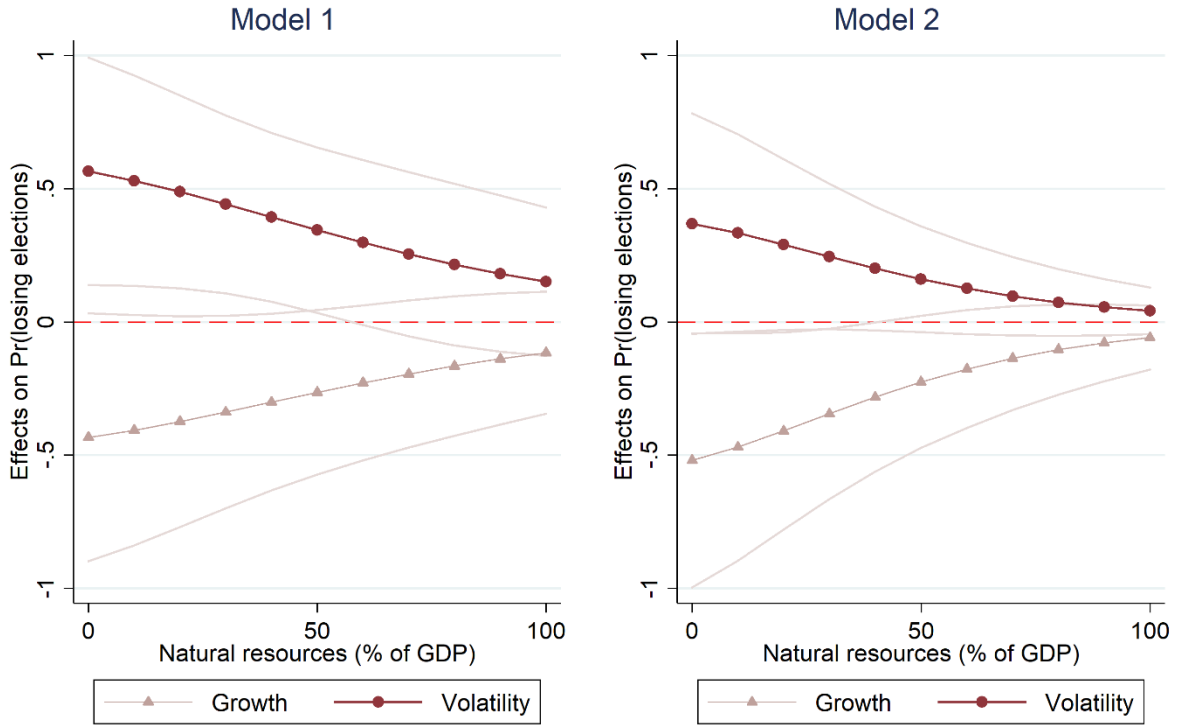

**Online appendix**

The self-defeating game: how state capacity and policy choice affect political survival  
Dustin Gilbreath and Koba Turmanidze

**Graph A2. State capacity as a function of GDP growth**  
Marginal effects at 95% CIs

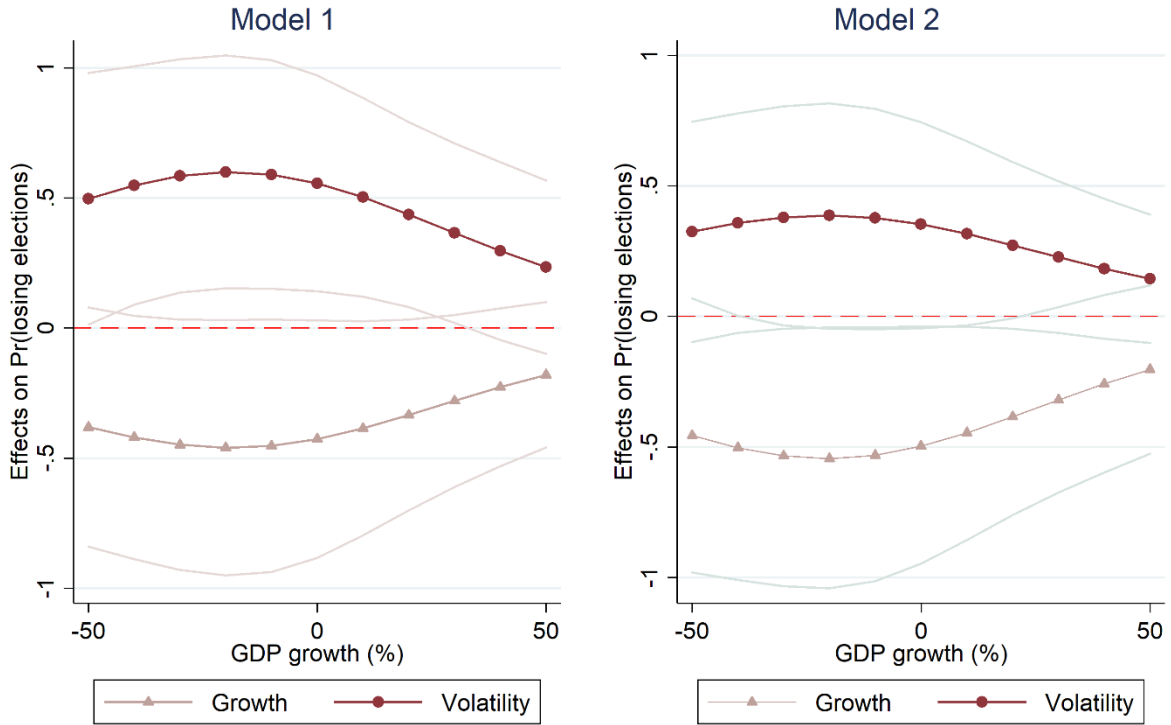



**Online appendix**

The self-defeating game: how state capacity and policy choice affect political survival  
Dustin Gilbreath and Koba Turmanidze

**Graph A3. State capacity as a function of democracy indicators**  
Marginal effects at 95% CIs

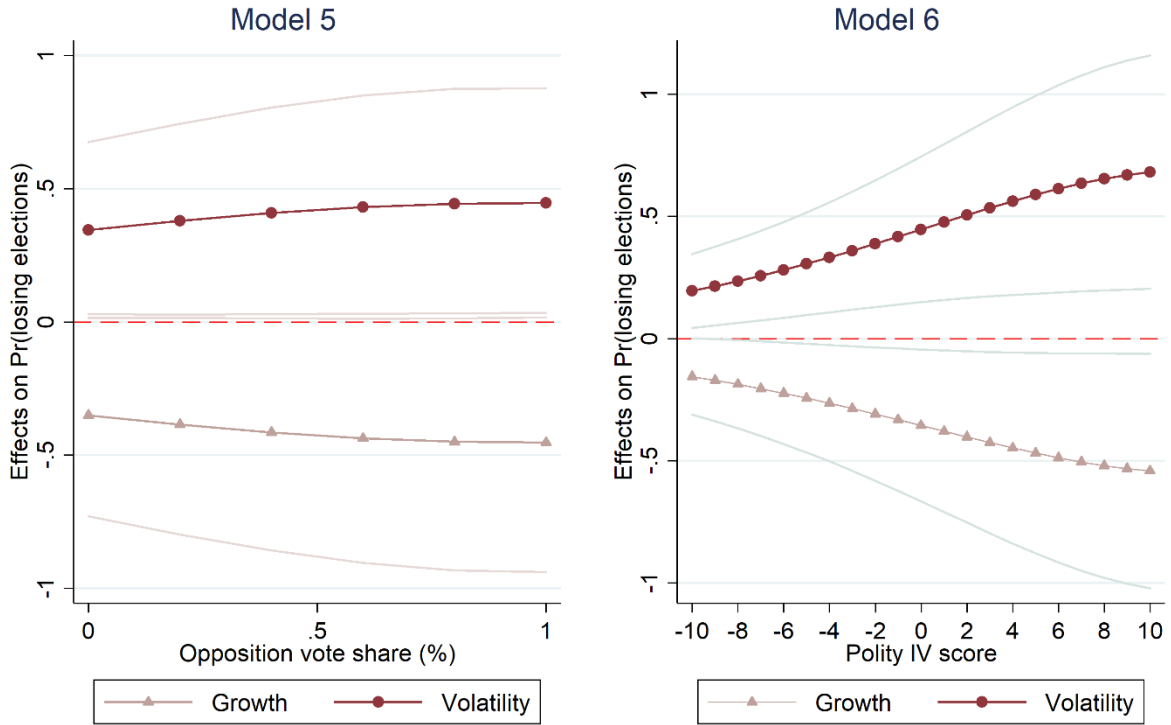

Supplement: Supplementary file 1 [file 1]
